# Supplementary material for: Testing mapping algorithms of the cancer-specific EORTC QLQ-C30 onto EQ-5D in malignant mesothelioma
Source: Springer Nature journal article supplement (doi:10.1186/s12955-014-0196-y), 2015-01-01

Appendix 1. Distribution of EQ-5D values. A- Observed values (UK tariff), B- Longworth algorithm, C- McKenzie algorithm.

A)

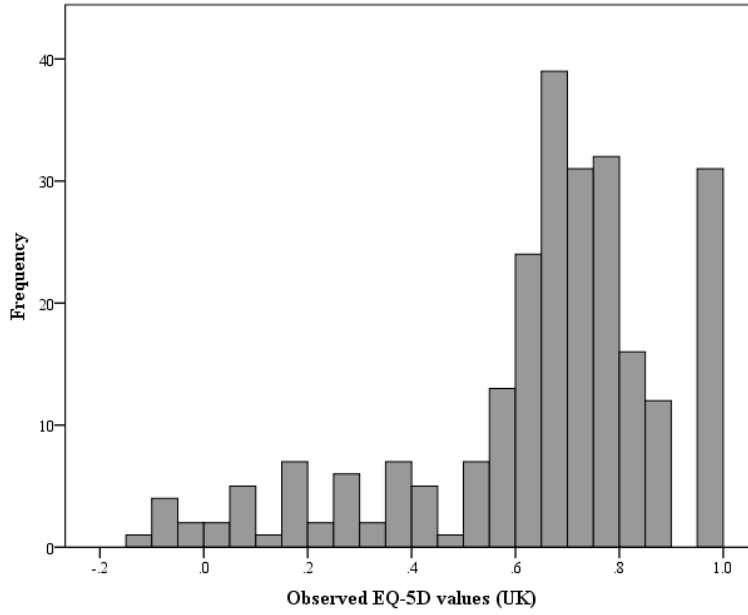

B)

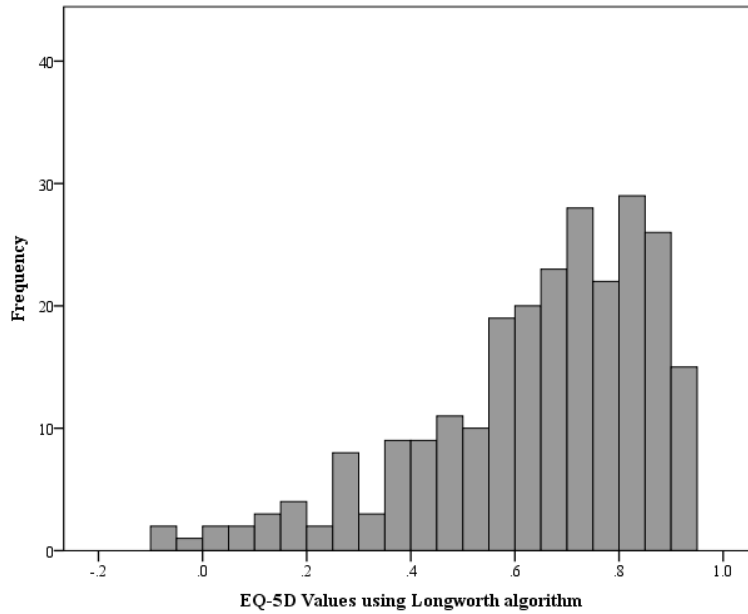

C)

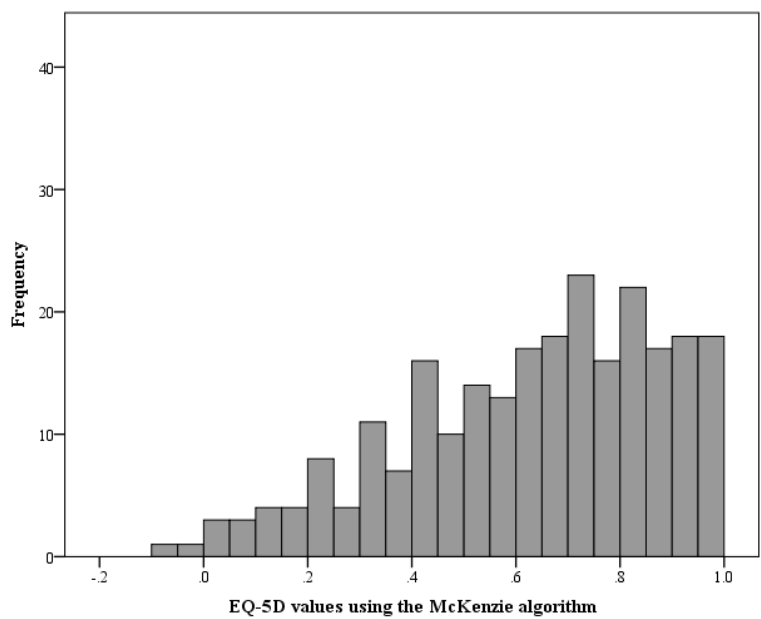

Supplement: MOESM2 [file 9763934]
